# Supplementary material for: Synthesis of a hierarchical nanoporous carbon material with controllable pore size and effective surface area for high-performance electrochemical capacitors
Source: Royal Society of Chemistry journal article supplement (doi:10.1039/c7ra01151b), 2017-01-01
Supplement: c7ra01151b1.pdf [file c7ra01151b1.pdf]

# Supporting information

1

2

## 3 **Synthesis of hierarchical nanoporous carbon material with** 4 **controllable pore size and effective surface area for high-** 5 **performance electrochemical capacitors**

6

7 Bing Hu <sup>a</sup>, Ling-Bin Kong <sup>a,b,\*</sup>, Long Kang <sup>b</sup>, Kun Yan <sup>a</sup>, Tong Zhang <sup>a</sup>, Kai Li <sup>a</sup>, and  
8 Yong-Chun Luo <sup>b</sup>

9

10 <sup>a</sup> *State Key Laboratory of Advanced Processing and Recycling of Non-ferrous Metals,*

11 *Lanzhou University of Technology, Lanzhou 730050, P. R. China*

12 <sup>b</sup> *School of Materials Science and Engineering, Lanzhou University of Technology,*

13 *Lanzhou 730050, P. R. China*

14

15 \*Corresponding author: Tel.: +86-931-2976579; Fax: +86-931-2976578.

16 E-mail address: [konglb@lut.cn](mailto:konglb@lut.cn)

17

18 This supporting information includes:

19 Scheme S1, Scheme S2, Table S1, Table S2, Figure S1, Figure S2, Figure S3, Figure  
20 S4, Figure S5, Figure S6 and Figure S7

21

22

23

24

25

1

2 (1) Formation of carbocation  $^+CCl_3$

3

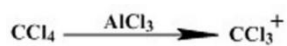

4 (2) Formation of  $-CCl_2-$  crosslinking bridges

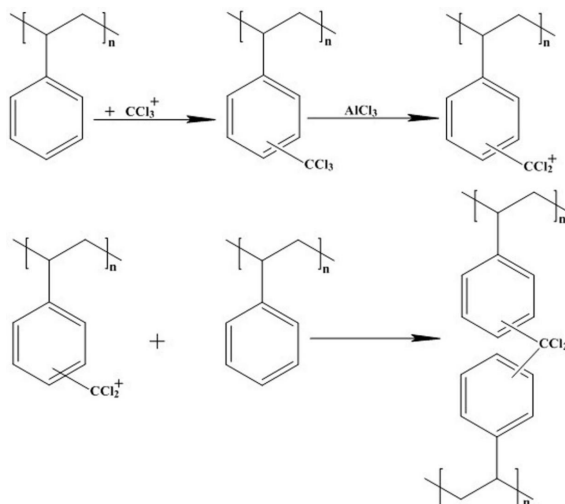

5

6 (3) Formation of  $-CO-$  crosslinking bridges

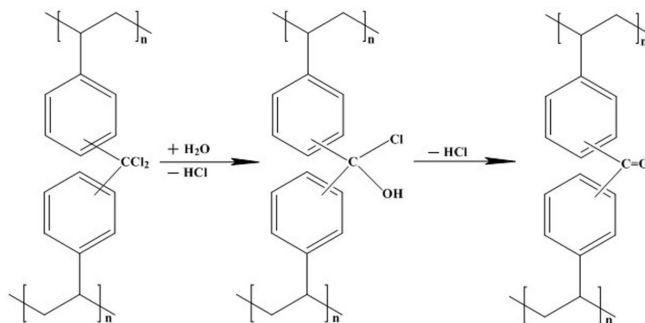

7

8 **Scheme S1** Formation mechanism of  $-CO-$  crosslinking bridge for (I) polymer network of IPN.

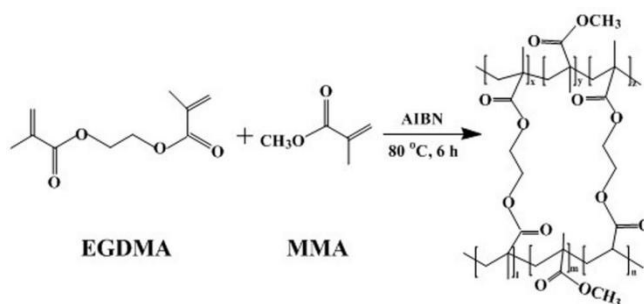

9

10 **Scheme S2** Formation mechanism of (II) polymer network of IPN.

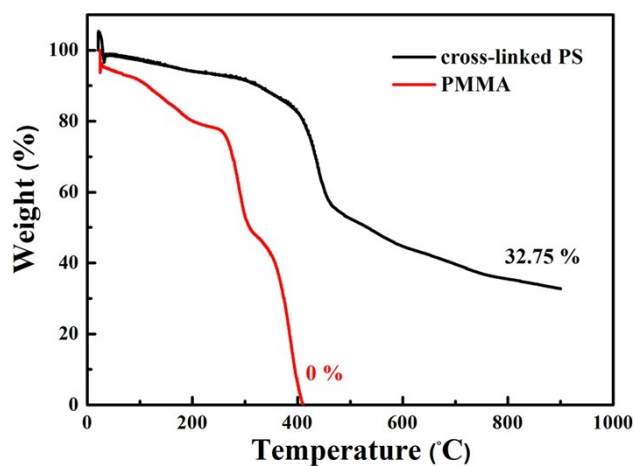

1  
2  
3 **Figure S1** TGA curves of the cross-linked PS and PMMA.

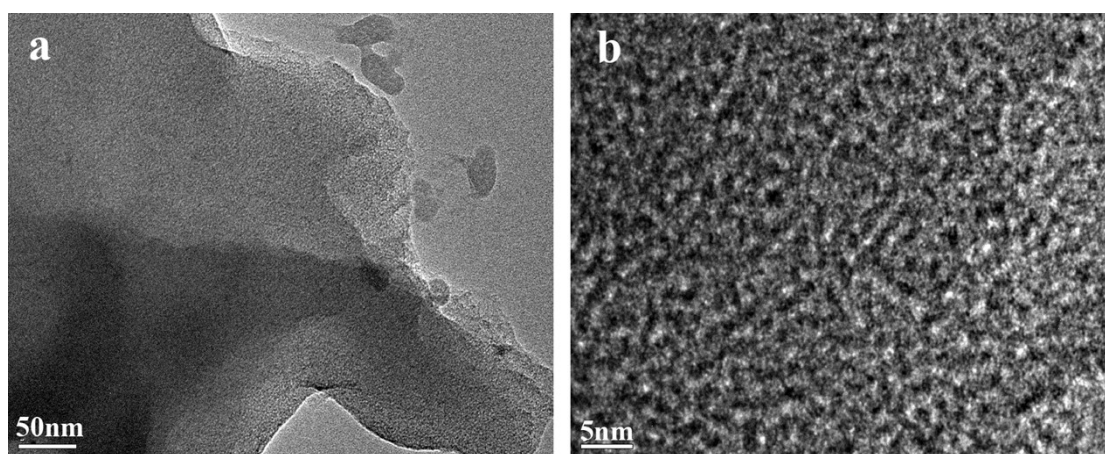

4  
5 **Figure S2** TEM images of (a) HNC synthesized cross-linked PS pyrolysis; HRTEM images of (b)  
6 HNC.

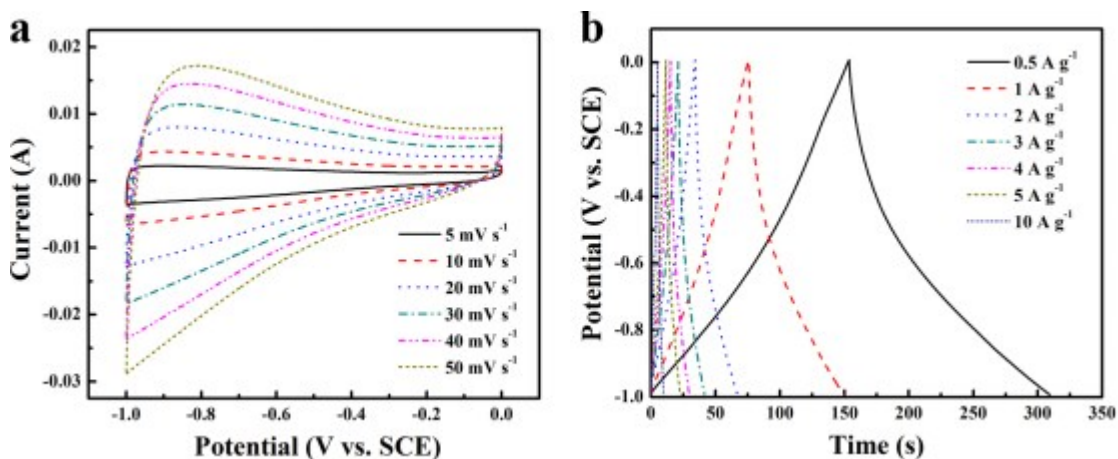

7  
8  
9 **Figure S3** Electrochemical performance of HNC electrode in 6 mol L<sup>-1</sup> KOH aqueous electrolyte:  
10 (a) CV curves measured at different scan rates from 5 to 50 mV s<sup>-1</sup> with a potential window from -  
11 1 to 0V; (b) Galvanostatic charge-discharge curves measured at different current densities from  
12 0.5 to 10 A g<sup>-1</sup>.

13

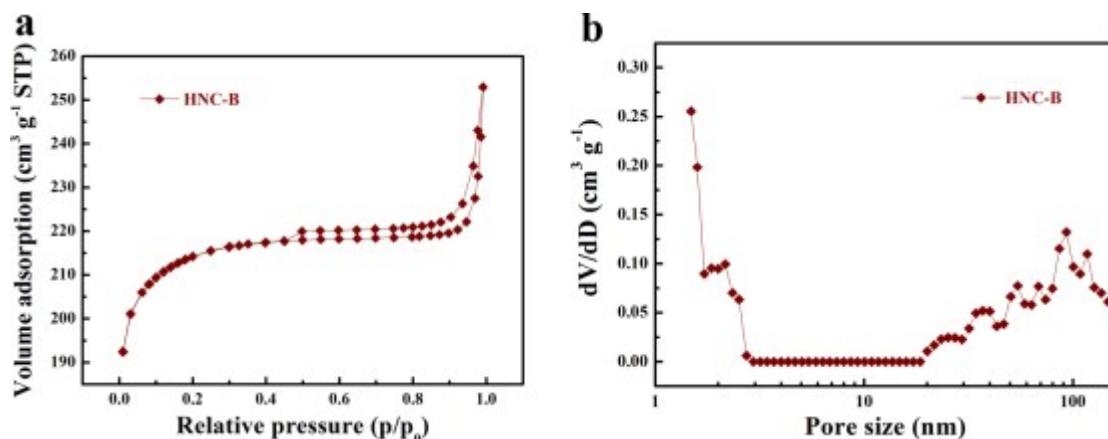

1  
 2 **Figure S4** (a)  $N_2$  adsorption-desorption isotherms and (b) pore size distributions corresponding to  
 3 the HNC-B pyrolysed by PS/PMMA polymer blend with the mass ratio of 20/80.

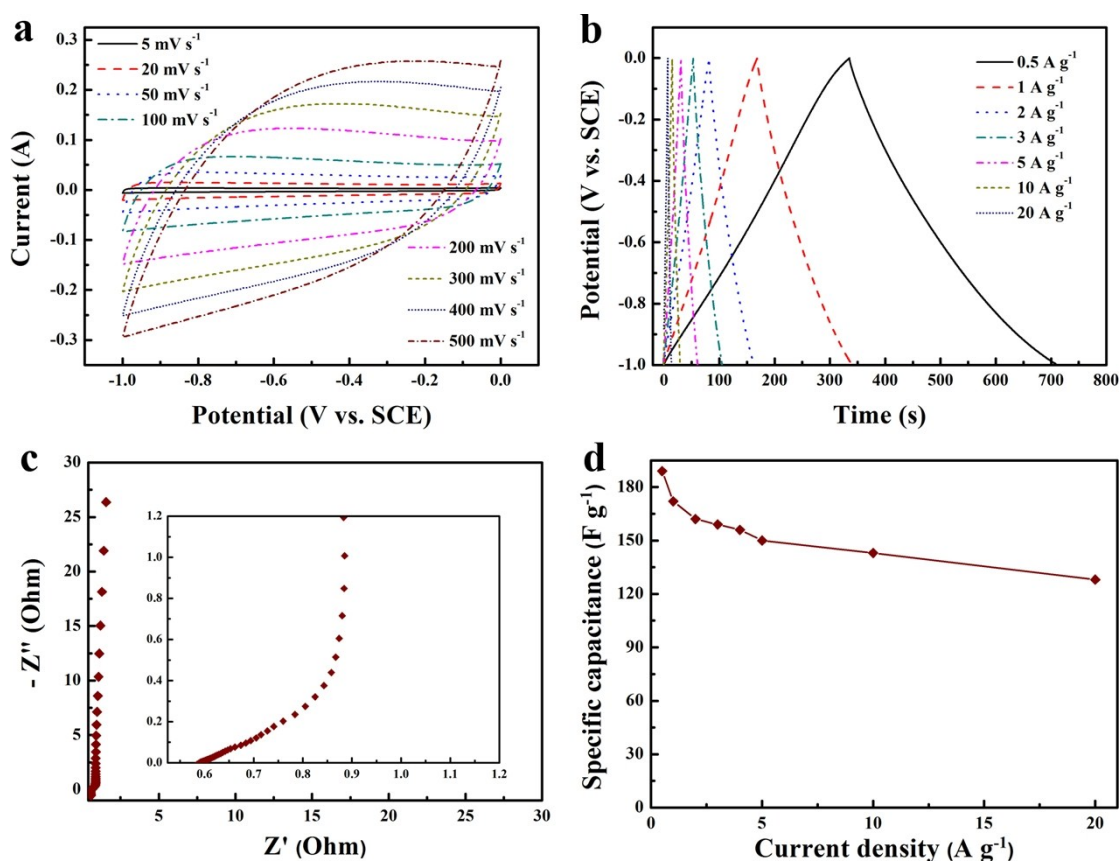

4  
 5 **Figure S5** Electrochemical performance of HNC-B pyrolysed by PS/PMMA blend with the mass  
 6 ratio of 20/80 in  $6 \text{ mol L}^{-1}$  KOH aqueous electrolyte: (a) CV curves measured at different scan  
 7 rates from 5 to  $500 \text{ mV s}^{-1}$  with a potential window from -1 to 0V; (b) Galvanostatic charge-  
 8 discharge curves measured at different current densities from 0.5 to  $20 \text{ A g}^{-1}$ ; (c) EIS curve  
 9 measured in the frequency range from  $10^{-5}$  to  $10^{-2}$  Hz at the open circuit potential with an alternate  
 10 current amplitude of 5 mV; (d) Specific capacitances of the HNC-B under different current  
 11 densities ranging from 0.5 to  $20 \text{ A g}^{-1}$ ;

12  
 13  
 14

1 **Table S1**

| Sample | PS/PMMA<br>(mg/mg) | $S_{\text{BET}}^a$<br>( $\text{m}^2\text{g}^{-1}$ ) | $S_{\text{mic}}^b$<br>( $\text{m}^2\text{g}^{-1}$ ) | $S_{\text{meso}}^c$<br>( $\text{m}^2\text{g}^{-1}$ ) | $V_{\text{total}}^d$<br>( $\text{cm}^3\text{g}^{-1}$ ) | $V_{\text{mic}}^e$<br>( $\text{cm}^3\text{g}^{-1}$ ) | $V_{\text{mic}}/V_{\text{total}}$<br>(%) | $D_a^f$<br>(nm) | $C_g^h$<br>( $\text{Fg}^{-1}$ ) |
|--------|--------------------|-----------------------------------------------------|-----------------------------------------------------|------------------------------------------------------|--------------------------------------------------------|------------------------------------------------------|------------------------------------------|-----------------|---------------------------------|
| HNC-B  | 20/80              | 608                                                 | 505                                                 | 103                                                  | 0.35                                                   | 0.28                                                 | 80                                       | 2.3             | 189                             |

2 <sup>a</sup> The specific surface areas were calculated using the BET method. <sup>b</sup> Micropore surface area. <sup>c</sup>  
 3 Mesopore surface area. <sup>d</sup> Total pore volume measured at  $P/P_0=0.99$ . <sup>e</sup> Micropore volume. <sup>f</sup> The  
 4 average pore diameters were calculated from the adsorption of the isotherms by using the DFT  
 5 model. <sup>h</sup> Calculated from the galvanostatic discharge curve at the current density at  $0.5 \text{ A g}^{-1}$  in  
 6 6M KOH aqueous electrolyte based on the three-electrode system.

7  
 8 **Table S2** Parameters determined by Raman spectrum of HNC, HNC-IPN-1, HNC-IPN-2, HNC-  
 9 IPN-3, HNC-IPN-4 and HNC-IPN-5.

| Sample    | Peak position ( $\text{cm}^{-1}$ ) |      | Peak area |        | $L_a$ (nm) |
|-----------|------------------------------------|------|-----------|--------|------------|
|           | D                                  | G    | D         | G      |            |
| HNC       | 1335                               | 1596 | 878576    | 416226 | 2.06       |
| HNC-IPN-1 | 1336                               | 1595 | 233720    | 120833 | 2.25       |
| HNC-IPN-2 | 1337                               | 1592 | 356920    | 186890 | 2.27       |
| HNC-IPN-3 | 1346                               | 1591 | 1444296   | 760805 | 2.29       |
| HNC-IPN-4 | 1348                               | 1591 | 1167767   | 622419 | 2.31       |
| HNC-IPN-5 | 1343                               | 1592 | 296346    | 193217 | 2.28       |

10

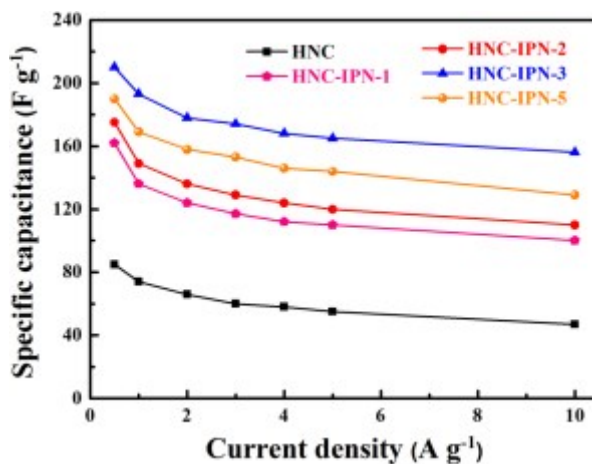

11

12 **Figure S6** Specific capacitance of the four carbons at different current densities ranging from 0.5  
 13 to  $10 \text{ A g}^{-1}$ .

14

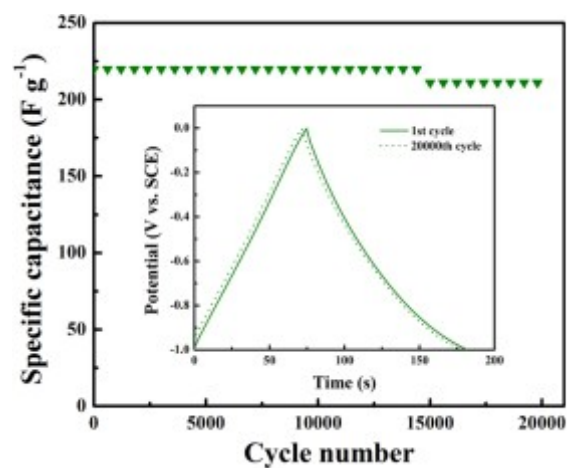

1  
 2 **Figure S7** Cycling performance of the HNC-IPN-4 electrode in 6 M KOH aqueous electrolyte.  
 3 And the galvanostatic charge-discharge curves (shown as an inset) before and after 20 000 cycles.  
 4 Data were obtained from a three-electrode system by using the galvanostatic charge-discharge  
 5 technique with a current density of 2 A g<sup>-1</sup>.  
 6
